# Supplementary material for: Network Understanding of Herb Medicine via Rapid Identification of Ingredient-Target Interactions
Source: PubMed Central journal article supplement (PMC3893644; doi:10.1038/srep03719), 2014-01-16
Supplement: srep03719-s1.pdf [file srep03719-s1.pdf]

# Network Understanding of Herb Medicine via Rapid Identification of Ingredient-Target Interactions

Hai-Ping Zhang <sup>1,#</sup>, Jian-Bo Pan <sup>2,#</sup>, Chi Zhang <sup>1</sup>, Nan Ji <sup>1</sup>, Hao Wang <sup>2</sup>, Zhi-Liang Ji <sup>1,2,\*</sup>

<sup>1</sup> State Key Laboratory of Stress Cell Biology, School of Life Sciences, Xiamen University, Xiamen, Fujian, 361102, PR China

<sup>2</sup> Department of Chemical Biology, College of Chemistry and Chemical Engineering, The Key Laboratory for Chemical Biology of Fujian Province, Xiamen University, Xiamen, Fujian, 361005, PR China

\*Corresponding author: Tel.: 86-0592-2182897; Fax: 86-0592-2182897; E-mail: [appo@xmu.edu.cn](mailto:appo@xmu.edu.cn)

# These two authors contributed equally to this work.

**Figure S1.** The pharmacophore analysis of drugs and Yadanzi ingredients against the common protein target EGFR. The pharmacophore groups were determined using the Pharmacophore module of the Molecular Operating Environment (MOE) software.

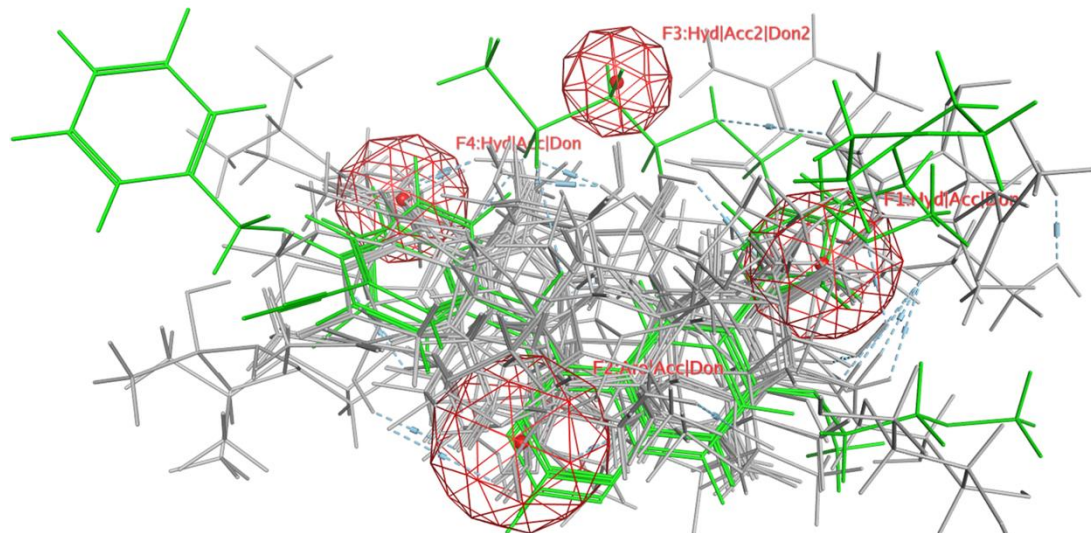

|             |                                                        |
|-------------|--------------------------------------------------------|
| Hyd ACC Don | H-bond Acceptor   Donor                                |
| F           | Pharmacophore Feature                                  |
| Aro ACC Don | Aromatic and pseudo aromatic rings Acceptor<br>  Donor |
| Hyd ACC Don | H-bond Acceptor Projection   Donor<br>projection       |

**Figure S2.** The structure of the thirteen ingredients of Yadanzi, grouped by their similarities in QSAR properties.

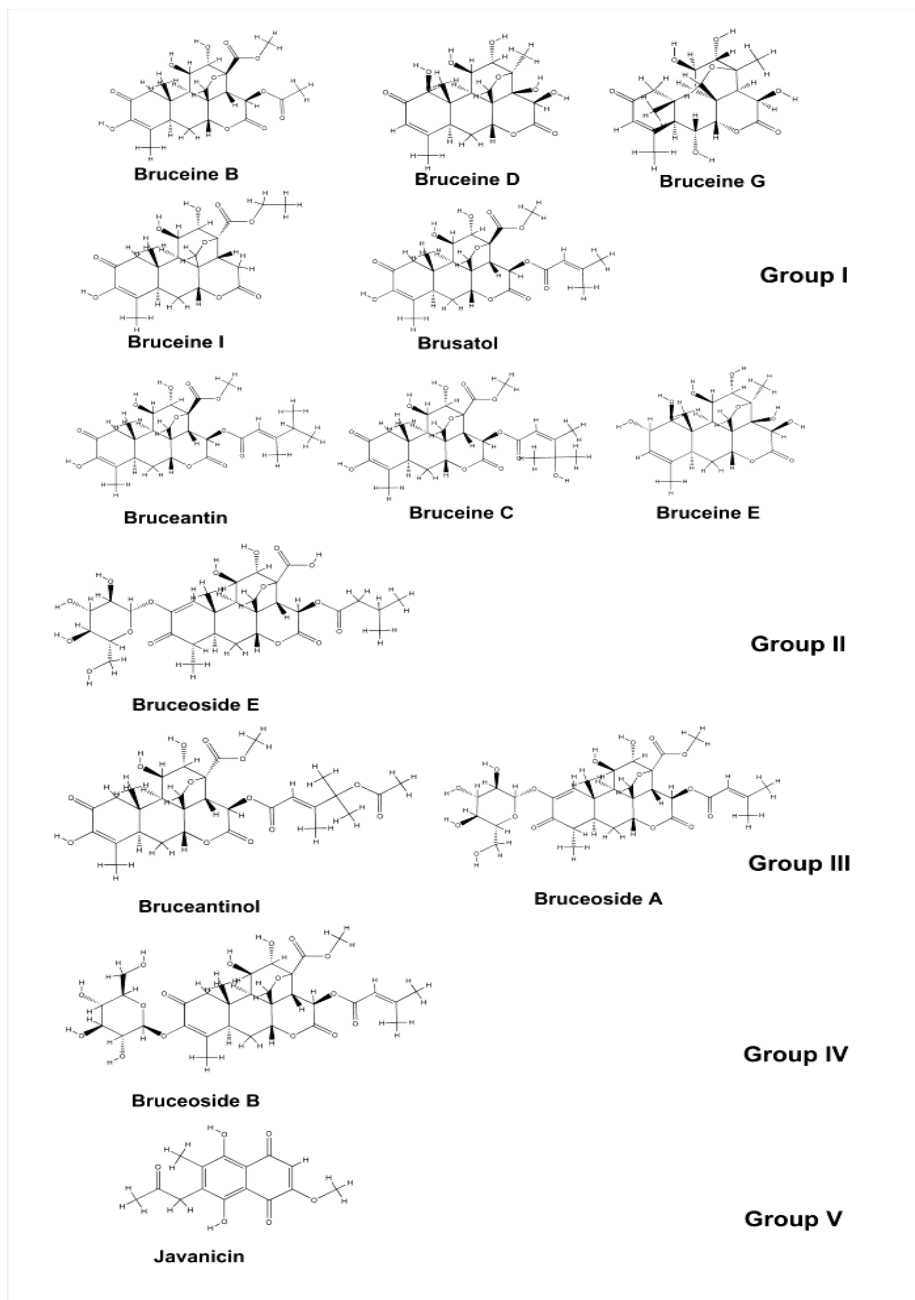

**Table S1.** Putative targets of Yadanzi thirteen ingredients and their potential clinical indications.

| Therapeutic Activities <sup>a</sup> | Group I                                                                                                                                                                                                                                                        |                                                                                                                                                                                                                                                                                               |                                                                                                                                                                                                                                                                                               |                                                                                                                                                                                                                                                                      |                                                                                                                                                                                                                                       | Group II                                                                                                                                                                                                                               |                                                                                                                                                                                                                                                     |                                                                                                                                                                                                                                                               |                                                                                                                                                | Group III                                                                                                                                                               |                                                                                                                | Group IV                                                                                                                      | Group V                                                                                                                                                                                                                                                                                             | Sum |
|-------------------------------------|----------------------------------------------------------------------------------------------------------------------------------------------------------------------------------------------------------------------------------------------------------------|-----------------------------------------------------------------------------------------------------------------------------------------------------------------------------------------------------------------------------------------------------------------------------------------------|-----------------------------------------------------------------------------------------------------------------------------------------------------------------------------------------------------------------------------------------------------------------------------------------------|----------------------------------------------------------------------------------------------------------------------------------------------------------------------------------------------------------------------------------------------------------------------|---------------------------------------------------------------------------------------------------------------------------------------------------------------------------------------------------------------------------------------|----------------------------------------------------------------------------------------------------------------------------------------------------------------------------------------------------------------------------------------|-----------------------------------------------------------------------------------------------------------------------------------------------------------------------------------------------------------------------------------------------------|---------------------------------------------------------------------------------------------------------------------------------------------------------------------------------------------------------------------------------------------------------------|------------------------------------------------------------------------------------------------------------------------------------------------|-------------------------------------------------------------------------------------------------------------------------------------------------------------------------|----------------------------------------------------------------------------------------------------------------|-------------------------------------------------------------------------------------------------------------------------------|-----------------------------------------------------------------------------------------------------------------------------------------------------------------------------------------------------------------------------------------------------------------------------------------------------|-----|
|                                     | Bruceine B                                                                                                                                                                                                                                                     | Bruceine D                                                                                                                                                                                                                                                                                    | Bruceine G                                                                                                                                                                                                                                                                                    | Bruceine I                                                                                                                                                                                                                                                           | Brusatol                                                                                                                                                                                                                              | Bruceantin                                                                                                                                                                                                                             | Bruceine C                                                                                                                                                                                                                                          | Bruceine E                                                                                                                                                                                                                                                    | Bruceoside E                                                                                                                                   | Bruceantinol                                                                                                                                                            | Bruceoside A                                                                                                   | Bruceoside B                                                                                                                  | Javanicin                                                                                                                                                                                                                                                                                           |     |
| Anti-hypertension                   | 15<br>CA1, MMP2, PPARD, CA2, MME, ACE, REN, CA12, PDE4B, NR3C2, TNNC1, AKR1C3, PDE4D, CALM1, PLAT                                                                                                                                                              | 16<br>CA1, MMP2, PPARD, CA2, MME, ACE, REN, AOC3, AVPR1A, PDE4B, NR3C2, TNNC1, AKR1C3, PDE4D, CALM1, PLAT                                                                                                                                                                                     | 15<br>CA1, MMP2, PPARD, CA2, MME, ACE, REN, NR3C2, CA12, AVPR1A, PDE4B, TNNC1, PDE4D, CALM1, PLAT                                                                                                                                                                                             | 15<br>CA1, MMP2, PPARD, CA2, MME, ACE, REN, NR3C2, CA12, AVPR1A, PDE4B, TNNC1, PDE4D, CALM1, PLAT                                                                                                                                                                    | 13<br>CA1, MMP2, PPARD, CA2, MME, ACE, REN, PDE4B, NR3C2, TNNC1, PDE4D, CALM1, PLAT                                                                                                                                                   | 11<br>CA1, MMP2, PPARD, CA2, MME, ACE, REN, PDE4B, NR3C2, TNNC1, PDE4D, CALM1, PLAT                                                                                                                                                    | 13<br>CA1, MMP2, PPARD, CA2, MME, ACE, REN, PDE4B, NR3C2, TNNC1, PDE4D, CALM1, PLAT                                                                                                                                                                 | 16<br>CA1, MMP2, PPARD, CA2, MME, ACE, REN, AVPR1A, NR3C2, CA12, AVPR1A, TNNC1, PDE4D, CALM1, PLAT                                                                                                                                                            | 7<br>MMP2, PPARD, MME, ACE, REN, PDE4D, CALM1                                                                                                  | 10<br>CA1, MMP2, CA2, MME, ACE, REN, PDE4B, PDE4D, CALM1, PLAT                                                                                                          | 4<br>ACE, REN, PDE4D, CALM1                                                                                    | 6<br>CA2, ACE, REN, PDE4D, CALM1, PLAT                                                                                        | 15<br>CA1, MMP2, PPARD, CA2, MME, ACE, REN, NR3C2, CA12, AVPR1A, TNNC1, AKR1C3, PDE4D, CALM1, PLAT                                                                                                                                                                                                  | 17  |
| Anti-inflammation                   | 17<br>NR3C1, RXRA, PPARD, PDXK, FDPS, PDXK, PLA2G2A, PDXP, AKR1B1, ALDH7A1, HSP90AA1, CBS, GLO1, NR3C2, PGR, FGF1, NOS2, PPARG                                                                                                                                 | 18<br>HSP90AA1, NR3C1, RXRA, PPARD, PDXK, FDPS, PDXK, PLA2G2A, PDXP, AKR1B1, ALDH7A1, HSP90AA1, CBS, GLO1, FGF1, NR3C2, AR, PGR, NOS2, PPARG                                                                                                                                                  | 18<br>NR3C1, RXRA, PPARD, PDXK, FDPS, PDXK, PLA2G2A, PDXP, AKR1B1, ALDH7A1, HSP90AA1, CBS, GLO1, FGF1, NR3C2, AR, PGR, NOS2, PPARG                                                                                                                                                            | 18<br>NR3C1, RXRA, PPARD, PDXK, FDPS, PDXK, PLA2G2A, PDXP, AKR1B1, ALDH7A1, HSP90AA1, CBS, GLO1, FGF1, NR3C2, AR, PGR, NOS2, PPARG                                                                                                                                   | 16<br>NR3C1, RXRA, PPARD, PDXK, FDPS, PDXK, PLA2G2A, PDXP, AKR1B1, ALDH7A1, HSP90AA1, CBS, GLO1, NR3C2, PGR, NOS2                                                                                                                     | 14<br>NR3C1, RXRA, PPARD, PDXK, FDPS, PDXK, PLA2G2A, PDXP, AKR1B1, ALDH7A1, HSP90AA1, CBS, GLO1, PGR, NOS2                                                                                                                             | 14<br>NR3C1, RXRA, PPARD, PDXK, FDPS, PDXK, PLA2G2A, PDXP, AKR1B1, ALDH7A1, HSP90AA1, CBS, GLO1, PGR, NOS2                                                                                                                                          | 18<br>NR3C1, RXRA, PPARD, PDXK, FDPS, PDXK, PLA2G2A, PDXP, AKR1B1, ALDH7A1, HSP90AA1, CBS, GLO1, PGR, NOS2, PPARG                                                                                                                                             | 12<br>PPARD, PDXK, PLA2G2A, PDXP, AKR1B1, ALDH7A1, HSP90AA1, CBS, GLO1, RXRA, NOS2, PPARG                                                      | 13<br>NR3C1, RXRA, PDXK, FDPS, AKR1B1, ALDH7A1, HSP90AA1, CBS, GLO1, NOS2                                                                                               | 11<br>PDXK, PDXP, AKR1B1, ALDH7A1, HSP90AA1, CBS, GLO1, RXRA, NOS2, PPARG                                      | 5<br>FDPS, CBS, GLO1, NOS2, PPARG                                                                                             | 18<br>NR3C1, RXRA, PPARD, FDPS, PLA2G2A, PDXP, AKR1B1, ALDH7A1, HSP90AA1, CBS, GLO1, DHODH, NR3C2, AR, PGR, FGF1, NOS2, PPARG                                                                                                                                                                       | 19  |
| Antineoplasation or Anticancer      | 44<br>ABL1, AKR1B1, ATIC, BRAF, C1R, CHD1, CSF1R, DCK, DHFR, EGFR, ERBB2, ESR1, ESRRG, F2, FDPS, GART, GSR, HDAC8, HMGCGR, HPRT1, IMPDH2, ITGAL, KDR, KIT, LDLR, MAPK1, MMP1, MMP10, MMP12, MMP2, MMP3, MMP7, MMP8, NOS2, PGR, PLA2G2A, PNP, POLB, PPARD, RARA | 47<br>ABL1, AKR1B1, AR, ATIC, BRAF, C1R, CHD1, CSF1R, DCK, DHFR, EGFR, ERBB2, FSHR, GART, GSR, HDAC8, HMGCGR, HPRT1, IMPDH2, ITGAL, LDLR, KDR, KIT, LDLR, MAPK1, MMP1, MMP10, MMP12, MMP2, MMP3, MMP8, MMP9, NOS2, NR3C1, PGR, PLA2G2A, PNP, POLB, PPARD, RXRA, SHMT1, SIRT5, TOP1, TYMS, VDR | 44<br>ABL1, AKR1B1, AR, ATIC, BRAF, C1R, CHD1, CSF1R, DCK, DHFR, EGFR, ERBB2, FSHR, GART, GSR, HDAC8, HMGCGR, HPRT1, IMPDH2, ITGAL, LDLR, KDR, KIT, LDLR, MAPK1, MMP1, MMP10, MMP12, MMP2, MMP3, MMP8, MMP9, NOS2, NR3C1, PGR, PLA2G2A, PNP, POLB, PPARD, RXRA, SHMT1, SIRT5, TOP1, TYMS, VDR | 48<br>ABL1, AKR1B1, AR, ATIC, BRAF, C1R, CHD1, CSF1R, DCK, DHFR, EGFR, ERBB2, ESR1, ESRRG, F2, FDPS, FSHR, GART, GSR, HMGCGR, HPRT1, IMPDH2, ITGAL, KIT, MAPK1, MMP1, MMP10, MMP12, MMP13, MMP2, MMP3, MMP7, MMP8, NOS2, PPARG, RARA, RXRA, SHMT1, SIRT5, TOP1, TYMS | 46<br>ABL1, AKR1B1, ATIC, BRAF, C1R, CHD1, CSF1R, DCK, DHFR, EGFR, ERBB2, ESR1, ESRRG, F2, FDPS, FSHR, GART, GSR, HMGCGR, HPRT1, IMPDH2, ITGAL, KDR, MMP1, MMP10, MMP12, MMP2, MMP3, MMP7, MMP8, NOS2, PPARG, RXRA, SIRT5, TOP1, TYMS | 36<br>ABL1, AKR1B1, ATIC, BRAF, CHD1, CSF1R, DCK, DHFR, EGFR, ERBB2, ESR1, ESRRG, F2, FDPS, GART, GSR, HMGCGR, IMPDH2, ITGAL, KDR, MMP1, MMP10, MMP12, MMP2, MMP3, MMP8, NOS2, PGR, PLA2G2A, PNP, POLB, PPARD, RXRA, SIRT5, TOP1, TYMS | 37<br>ABL1, AKR1B1, ATIC, BRAF, CHD1, CSF1R, DCK, DHFR, EGFR, ERBB2, ESR1, ESRRG, F2, FDPS, FSHR, GART, GSR, HMGCGR, HPRT1, IMPDH2, KDR, LDLR, MAPK1, MMP1, MMP10, MMP12, MMP2, MMP3, MMP7, MMP8, NOS2, PPARD, RARA, RXRA, SHMT1, SIRT5, TOP1, TYMS | 44<br>ABL1, AKR1B1, AR, ATIC, C1R, CHD1, CSF1R, DCK, DHFR, EGFR, ERBB2, ESR1, ESRRG, F2, FDPS, FSHR, GART, GSR, HDAC8, HMGCGR, HPRT1, IMPDH2, KDR, LDLR, MAPK1, MMP1, MMP10, MMP12, MMP2, MMP3, MMP7, MMP8, NOS2, PPARD, RARA, RXRA, SHMT1, SIRT5, TOP1, TYMS | 26<br>ABL1, AKR1B1, BRAF, CHD1, DHFR, EGFR, ESR1, ESRRG, F2, FSHR, HMGCGR, IMPDH2, KDR, LDLR, MMP1, MMP12, MMP2, MMP3, NOS2, PPARD, RXRA, TOP1 | 29<br>ABL1, AKR1B1, ATIC, BRAF, CHD1, DHFR, EGFR, ESR1, ESRRG, F2, FSHR, HMGCGR, IMPDH2, KDR, LDLR, MMP1, MMP12, MMP2, MMP3, NOS2, PGR, PLA2G2A, RARA, RXRA, TOP1, TYMS | 16<br>ABL1, AKR1B1, ATIC, BRAF, CHD1, EGFR, F2, FSHR, GART, HMGCGR, IMPDH2, MMP12, NOS2, PNP, POLB, RXRA, TOP1 | 18<br>ABL1, ATIC, BRAF, CHD1, EGFR, ERBB2, ESR1, F2, FDPS, GART, HMGCGR, KDR, KIT, MMP1, MMP12, NOS2, POLB, RARA, TOP1, TUBG1 | 47<br>ABL1, AKR1B1, AR, ATIC, BRAF, C1R, CHD1, CSF1R, DCK, DHFR, EGFR, ERBB2, ESR1, ESRRG, F2, FDPS, FSHR, GART, GSR, HDAC8, HMGCGR, HPRT1, IMPDH2, ITGAL, KIT, LDLR, MMP1, MMP10, MMP12, MMP13, MMP2, MMP3, MMP7, MMP8, MMP9, NOS2, NR3C1, PGR, PLA2G2A, PNP, POLB, PPARD, RXRA, SHMT1, SIRT5, VDR | 54  |

|                        |                                                                                                        |                                                                                                        |                                                                                            |                                                                                            |                                                                                            |                                                                                    |                                                                       |                                                          |                                                       |                                                |                                                                  |                                                                                                 |    |  |
|------------------------|--------------------------------------------------------------------------------------------------------|--------------------------------------------------------------------------------------------------------|--------------------------------------------------------------------------------------------|--------------------------------------------------------------------------------------------|--------------------------------------------------------------------------------------------|------------------------------------------------------------------------------------|-----------------------------------------------------------------------|----------------------------------------------------------|-------------------------------------------------------|------------------------------------------------|------------------------------------------------------------------|-------------------------------------------------------------------------------------------------|----|--|
|                        | RXRA, SHMT1, SIRT5, TOP1, TYMS                                                                         | PNP, POLB, PPARD, RARA, RXRA, SHMT1, SIRT5, TOP1, TYMS                                                 | PNP, POLB, PPARD, RARA, RXRA, SHMT1, SIRT5, TOP1, TYMS, VDR                                | TYMS                                                                                       | RARA, RXRA, SHMT1, SIRT5, TOP1, TYMS                                                       |                                                                                    |                                                                       |                                                          |                                                       |                                                |                                                                  |                                                                                                 |    |  |
| Anti-Obesity           | 3<br>CA2, PNLIP, FASN                                                                                  | 3<br>CA2, PNLIP, FASN                                                                                  | 3<br>CA2, PNLIP, FASN                                                                      | 3<br>CA2, PNLIP, FASN                                                                      | 1<br>CA2                                                                                   | 2<br>CA2, FASN                                                                     | 3<br>CA2, PNLIP, FASN                                                 | 1<br>FASN                                                | 1<br>PNLIP                                            | 1<br>FASN                                      | 1<br>CA2                                                         | 3<br>CA2, PNLIP, FASN                                                                           | 3  |  |
| Antirheumatism         | 6<br>DHFR, C1R, HPRT1, FCGR3B, ACAT1, PPARG                                                            | 7<br>DHFR, TNF, C1R, HPRT1, FCGR3B, ACAT1, PPARG                                                       | 7<br>DHFR, TNF, C1R, HPRT1, FCGR3B, ACAT1, PPARG                                           | 6<br>DHFR, DHODH, C1R, HPRT1, FCGR3B, ACAT1                                                | 7<br>DHFR, TNF, C1R, HPRT1, FCGR3B, ACAT1                                                  | 5<br>DHFR, TNFRSF1B, TNF, HPRT1, ACAT1                                             | 7<br>DHFR, TNF, C1R, HPRT1, FCGR3B, ACAT1, PPARG                      | 3<br>DHFR, TNFRSF1B, PPARG                               | 2<br>DHFR, ACAT1                                      | 1<br>PPARG                                     | 3<br>TNFRSF1B, FCGR3B, PPARG                                     | 7<br>DHFR, DHODH, C1R, HPRT1, FCGR3B, ACAT1, PPARG                                              | 9  |  |
| Antithrombus           | 7<br>PDE10A, PPARD, F2, SELP, F10, NOS2, SERPINC1                                                      | 7<br>PDE10A, PPARD, F2, SELP, F10, NOS2, SERPINC1                                                      | 7<br>PDE10A, PPARD, F2, SELP, F10, NOS2, SERPINC1                                          | 8<br>PDE10A, PPARD, F2, SERPIND1, SELP, F10, NOS2, SERPINC1                                | 6<br>PDE10A, PPARD, F2, SELP, NOS2, SERPINC1                                               | 8<br>PDE10A, PPARD, F2, SERPIND1, SELP, F10, NOS2, SERPINC1                        | 7<br>PDE10A, PPARD, F2, SERPIND1, SELP, F10, NOS2, SERPINC1           | 5<br>PDE10A, PPARD, F2, SERPIND1, NOS2, SERPINC1         | 4<br>F2, F10, NOS2, SERPINC1                          | 5<br>PDE10A, F2, SERPIND1, NOS2, SERPINC1      | 2<br>F2, NOS2                                                    | 7<br>PDE10A, PPARD, F2, SELP, F10, NOS2, SERPINC1                                               | 8  |  |
| Bronchodilator         | 9<br>NR3C1, PAH, MAPK1, PDE4B, PDE5A, NR3C2, PGR, PDE7A, PDE4D                                         | 9<br>NR3C1, PAH, TNF, PDE4B, PDE5A, NR3C2, PGR, PDE7A, PDE4D                                           | 9<br>NR3C1, PAH, NR3C2, TNF, PDE4B, PDE5A, PGR, PDE7A, PDE4D                               | 8<br>NR3C1, PAH, NR3C2, PGR, PDE4D                                                         | 7<br>NR3C1, PAH, MAPK1, PDE4B, PDE5A, NR3C2, PGR, PDE7A, PDE4D                             | 9<br>NR3C1, PAH, MAPK1, TNF, PDE4B, PDE5A, NR3C2, PGR, PDE7A, PDE4D                | 8<br>NR3C1, PAH, PDE5A, PGR, PDE7A, PDE4D                             | 2<br>PAH, PDE4D                                          | 6<br>NR3C1, PAH, PDE5A, PGR, PDE4D                    | 2<br>PDE5A, PDE4D                              | 1<br>PDE4D                                                       | 7<br>NR3C1, PAH, PDE5A, NR3C2, PGR, PDE7A, PDE4D                                                | 10 |  |
| Fibrinolysis           | 5<br>ITGB3, F2, F10, PPARG, SERPINC1                                                                   | 5<br>ITGB3, F2, ITGA2B, F10, PPARG, SERPINC1                                                           | 6<br>ITGB3, F2, ITGA2B, F10, PPARG, SERPINC1                                               | 4<br>ITGB3, F2, F10, SERPINC1                                                              | 6<br>ITGB3, F2, ITGA2B, F10, PPARG, SERPINC1                                               | 3<br>ITGB3, F2, SERPINC1                                                           | 4<br>ITGB3, F2, F10, ITGA2B, F10, PPARG, SERPINC1                     | 4<br>ITGB3, F2, ITGA2B, PPARG, SERPINC1                  | 4<br>ITGB3, F2, F10, SERPINC1                         | 3<br>F2, PPARG, SERPINC1                       | 2<br>F2, PPARG                                                   | 6<br>ITGB3, F2, ITGA2B, F10, PPARG, SERPINC1                                                    | 6  |  |
| Hypoglycemia           | 8<br>IGF1R, INSR, CFTR, CTSD, DPP4, IDE, AMY2A, PPARG                                                  | 8<br>IGF1R, INSR, CFTR, CTSD, DPP4, IDE, AMY2A, PPARG                                                  | 8<br>IGF1R, INSR, CFTR, CTSD, DPP4, IDE, AMY2A, PPARG                                      | 7<br>IGF1R, INSR, CFTR, CTSD, DPP4, IDE, AMY2A                                             | 8<br>IGF1R, INSR, CFTR, CTSD, DPP4, IDE, AMY2A, PPARG                                      | 7<br>IGF1R, INSR, CFTR, CTSD, DPP4, IDE, AMY2A                                     | 6<br>INSR, CFTR, CTSD, DPP4, IDE, AMY2A                               | 7<br>IGF1R, INSR, CFTR, CTSD, DPP4, IDE, INSR, PPARG     | 5<br>INSR, CFTR, CTSD, DPP4, IDE                      | 7<br>IGF1R, CFTR, CTSD, DPP4, IDE, INSR, PPARG | 6<br>INSR, CFTR, CTSD, DPP4, IDE, INSR, PPARG                    | 8<br>IGF1R, INSR, CFTR, CTSD, DPP4, IDE, AMY2A, PPARG                                           | 8  |  |
| Immunomodulatory agent | 15<br>CD247, ITGAV, ITGB3, C3, CD1A, CD4, FCER1A, PPIA, ELANE, C1R, ICAM1, ITGAL, FCGR3B, IL2RA, IL2RB | 16<br>CD247, ITGAV, ITGB3, C3, CD1A, CD4, FCER1A, PPIA, ELANE, C1R, ICAM1, ITGAL, FCGR3B, IL2RA, IL2RB | 15<br>CD247, ITGAV, ITGB3, C3, CD1A, CD4, FCER1A, PPIA, ICAM1, ITGAL, FCGR3B, IL2RA, IL2RB | 15<br>CD247, ITGAV, ITGB3, C3, CD1A, CD4, FCER1A, PPIA, ICAM1, ITGAL, FCGR3B, IL2RA, IL2RB | 15<br>CD247, ITGAV, ITGB3, C3, CD1A, CD4, FCER1A, PPIA, ICAM1, ITGAL, FCGR3B, IL2RA, IL2RB | 12<br>CD247, ITGAV, ITGB3, C3, CD1A, CD4, FCER1A, PPIA, ICAM1, ITGAL, IL2RA, IL2RB | 10<br>CD247, ITGAV, ITGB3, C3, CD1A, CD4, FCER1A, PPIA, TNFRSF1B, TNF | 8<br>ITGAV, ITGB3, C3, CD1A, CD4, FCER1A, PPIA, TNFRSF1B | 8<br>CD247, ITGAV, ITGB3, C3, CD1A, CD4, FCER1A, PPIA | 5<br>C3, CD1A, CD4, FCER1A, PPIA               | 9<br>C3, CD1A, CD4, FCER1A, PPIA, TNFRSF1B, FCGR3B, IL2RA, IL2RB | 15<br>CD247, ITGAV, ITGB3, C3, CD1A, CD4, FCER1A, PPIA, ICAM1, ITGAL, FCGR3B, IL2RA, IL2RB, C4A | 18 |  |

<sup>a</sup> The ingredient (drug)-target interaction pairs for each Yadanzi's pharmacological activity, e.g. anticancer, were determined by superimposing non-redundant putative targets of Yadanzi ingredients predicted by reverse docking approach against activity-associated proteins collected from on-line resources like KEGG and literatures.

**Table S2.** The binding affinity comparison between Yadanzi ingredients and their corresponding marketing drugs when they bind to the same protein target.

| Targets      | PDB_ID  | Drugs              |                    |               | Ingredients  |                    |               |
|--------------|---------|--------------------|--------------------|---------------|--------------|--------------------|---------------|
|              |         | Name               | MM/GBVI (kcal/mol) | Affinity(pki) | Name         | MM/GBVI (kcal/mol) | Affinity(pki) |
| ABL1         | 3EG3    | Imatinib           | -19.554            | 7.326         | bruceine B   | -17.693            | 5.437         |
| AKR1B1       | 1US0    | Sulindac           | -24.997            | 6.462         | bruceoside A | -29.122            | 8.013         |
|              |         |                    |                    |               | bruceantanol | -21.496            | 5.815         |
| AR           | 2AX6    | Flutamide          | -21.536            | 6.933         | javanicin    | -25.747            | 9.32          |
| ATIC         | 1P4R    | Pemetrexed         | -22.102            | 6.225         | bruceine C   | -41.855            | 13.78         |
|              |         |                    |                    |               | bruceoside B | -34.52             | 12.026        |
|              |         |                    |                    |               | bruceoside A | -27.845            | 8.441         |
|              |         |                    |                    |               | bruceine B   | -25.856            | 7.285         |
|              |         |                    |                    |               | bruceantanol | -23.583            | 7.686         |
|              |         |                    |                    |               | javanicin    | -19.428            | 6.76          |
| BRAF         | 1UWH    | Sorafenib          | -27.164            | 7.196         | bruceine I   | -18.234            | 8.441         |
|              |         |                    |                    |               | bruceoside B | -33.072            | 8.225         |
|              |         |                    |                    |               | bruceine C   | -27.343            | 6.303         |
|              |         |                    |                    |               | Bruceantanol | -25.173            | 8.021         |
|              |         |                    |                    |               | javanicin    | -22.758            | 6.711         |
|              |         |                    |                    |               | bruceoside A | -22.544            | 7.215         |
| CHD1         | 2B2W    | Epirubicin         | -26.73             | 12.638        | bruceine I   | -20.339            | 5.733         |
|              |         |                    |                    |               | bruceantanol | -31.501            | 17.845        |
|              |         |                    |                    |               | javanicin    | -28.987            | 8.337         |
| CSF1R        | 2I1M    | Imatinib           | -26.86             | 9.335         | brusatol     | -28.967            | 7.825         |
|              |         |                    |                    |               | bruceine C   | -24.22             | 6.837         |
| DHFR         | 1KMV    | Methotrexate       | -35.952            | 9.568         | bruceantanol | -27.828            | 11.028        |
|              |         |                    |                    |               | javanicin    | -23.092            | 9.023         |
| DHODH        | 3ZWT    | Leflunomide        | -19.635            | 7.462         | javanicin    | -25.343            | 9.835         |
| EGFR         | 1M17    | Erlotinib          | -15.565            | 8.051         | bruceine C   | -26.689            | 8.727         |
|              |         |                    |                    |               | Lapatinib    | -25.746            | 9.897         |
|              |         |                    |                    |               | Gefitinib    | -25.655            | 8.474         |
|              |         |                    |                    |               | bruceine E   | -26.019            | 8.493         |
|              |         |                    |                    |               | bruceoside A | -25.223            | 10.02         |
|              |         |                    |                    |               | bruceoside B | -24.587            | 6.695         |
|              |         |                    |                    |               | bruceoside E | -23.026            | 10.697        |
|              |         |                    |                    |               | bruceantin   | -22.556            | 6.988         |
|              |         |                    |                    |               | bruceine D   | -21.808            | 7.058         |
| bruceantanol | -19.816 | 6.735              |                    |               |              |                    |               |
| ERBB2        | 3PP0    | Lapatinib          | -38.773            | 12.327        | bruceine G   | -18.179            | 6.11          |
|              |         |                    |                    |               | javanicin    | -18.037            | 6.494         |
|              |         |                    |                    |               | bruceantin   | -25.245            | 7.159         |
| ESRRG        | 2E2R    | Diethylstilbestrol | -14.958            | 6.175         | bruceoside B | -23.663            | 7.2           |
|              |         |                    |                    |               | bruceine C   | -22.998            | 6.846         |
|              |         |                    |                    |               | bruceine C   | -32.183            | 9.595         |
| F2           | 2BVR    | Suramin            | -47.664            | 10.746        | bruceine C   | -49.037            | 12.206        |
|              |         |                    |                    |               | bruceoside B | -42.289            | 11.459        |
|              |         |                    |                    |               | bruceantanol | -40.149            | 10.093        |
|              |         |                    |                    |               | bruceine B   | -38.365            | 11.515        |
|              |         |                    |                    |               | bruceoside E | -33.542            | 11.704        |
| FDPS         | 2QIS    | Pamidronate        | -26.141            | 8.684         | javanicin    | -31.446            | 9.505         |
|              |         |                    |                    |               | bruceine I   | -22.067            | 7.191         |
| HMGCR        | 3CCZ    | Lovastatin         | -22.954            | 7.297         | bruceantanol | -26.048            | 8.279         |
|              |         |                    |                    |               | bruceine C   | -24.338            | 7.102         |
|              |         |                    |                    |               | bruceine B   | -22.589            | 7.596         |

|        |      |                           |         |        |              |          |        |
|--------|------|---------------------------|---------|--------|--------------|----------|--------|
| IMPDH1 | 1JCN | Mycophenolat<br>e mofetil | -27.377 | 9.48   | bruceantinal | -31.491  | 10.768 |
| IMPDH2 | 1NF7 | Mycophenolat<br>e mofetil | -26.874 | 8.168  | bruceoside A | -33.149  | 11.043 |
|        |      |                           |         |        | bruceine C   | -29.788  | 11.225 |
|        |      |                           |         |        | bruceine G   | -25.999  | 8.35   |
|        |      |                           |         |        | bruceantinal | -25.155  | 11.124 |
|        |      |                           |         |        | bruceantin   | -23.597  | 9.853  |
|        |      |                           |         |        | bruceine I   | -22.991  | 9.258  |
|        |      |                           |         |        | bruceine B   | -21.696  | 10.705 |
|        |      |                           |         |        | javanicin    | -20.404  | 7.586  |
| ITGAL  | 2ICA | Lovastatin                | -15.959 | 6.715  | javanicin    | -20.906  | 8.215  |
|        |      |                           |         |        | bruceine B   | -16.38   | 7.09   |
|        |      |                           |         |        | bruceine E   | -12.035  | 10.705 |
| KDR    | 2XIR | Sorafenib                 | -35.357 | 11.256 | bruceine C   | -40.469  | 8.987  |
|        |      |                           |         |        | bruceoside B | -38.596  | 9.878  |
|        |      |                           |         |        | bruceoside E | -29.677  | 10.098 |
|        |      |                           |         |        | bruceine I   | -19.345  | 7.162  |
|        |      |                           |         |        | bruceantinal | -19.224  | 8.199  |
| KIT    | 3G0E | Sorafenib                 | -25.827 | 8.422  | bruceoside E | -19.121  | 10.317 |
|        |      |                           |         |        | bruceine B   | -18.834  | 7.488  |
| MMP1   | 1HFC | Marimastat                | -17.288 | 5.931  | bruceoside E | -291.2   | 21.28  |
|        |      |                           |         |        | bruceine C   | -137.49  | 7.732  |
|        |      |                           |         |        | bruceine E   | -38.881  | 11.529 |
|        |      |                           |         |        | bruceantin   | -23.674  | 6.991  |
|        |      |                           |         |        | javanicin    | -21.043  | 5.732  |
|        |      |                           |         |        | bruceoside B | -20.976  | 9.208  |
| MMP10  | 1Q3A | Marimastat                | -25.978 | 6.607  | bruceoside E | -342.849 | 20.609 |
|        |      |                           |         |        | bruceine C   | -149.387 | 10.908 |
|        |      |                           |         |        | bruceine E   | -52.825  | 12.198 |
|        |      |                           |         |        | javanicin    | -35.746  | 5.315  |
| MMP12  | 1Y93 | Marimastat                | -31.953 | 5.251  | bruceine C   | -125.984 | 6.629  |
|        |      |                           |         |        | bruceoside A | -34.135  | 5.216  |
|        |      |                           |         |        | bruceoside B | -32.39   | 5.842  |
| MMP13  | 3ZXH | Marimastat                | -20.122 | 4.53   | javanicin    | -30.856  | 4.913  |
|        |      |                           |         |        | bruceine C   | -25.679  | 6.011  |
|        |      |                           |         |        | brusatol     | -22.997  | 8.924  |
| MMP2   | 1HOV | Marimastat                | -25.879 | 4.451  | bruceoside E | -542.643 | 33.914 |
|        |      |                           |         |        | bruceine E   | -71.895  | 17.592 |
|        |      |                           |         |        | bruceantin   | -23.238  | 4.962  |
|        |      |                           |         |        | bruceantinal | -18.406  | 4.89   |
| MMP3   | 1HY7 | Marimastat                | -33.438 | 7.214  | bruceine E   | -45.35   | 11.473 |
|        |      |                           |         |        | bruceine C   | -35.907  | 5.487  |
| MMP7   | 2Y6D | Marimastat                | -32.87  | 6.036  | bruceine E   | -50.418  | 11.103 |
|        |      |                           |         |        | javanicin    | -29.123  | 8.386  |
|        |      |                           |         |        | brusatol     | -23.929  | 6.041  |
| MMP8   | 1I76 | Marimastat                | -19.645 | 6.376  | bruceine E   | -50.46   | 12.627 |
|        |      |                           |         |        | bruceine D   | -29.848  | 6.914  |
|        |      |                           |         |        | bruceantin   | -24.563  | 6.066  |
|        |      |                           |         |        | brusatol     | -24.504  | 3.618  |
|        |      |                           |         |        | bruceine I   | -23.805  | 6.28   |
|        |      |                           |         |        | bruceine G   | -16.199  | 8.078  |
| MMP9   | 2OVX | Marimastat                | -18.499 | 6.548  | javanicin    | -19.537  | 6.125  |

|              |         |               |         |        |              |         |                        |         |        |              |          |        |
|--------------|---------|---------------|---------|--------|--------------|---------|------------------------|---------|--------|--------------|----------|--------|
| NOS2         | 3E7G    | Dexamethasone | -17.896 | 6.151  | bruceine C   | -142.23 | 8.392                  |         |        |              |          |        |
|              |         |               |         |        | bruceoside E | -52.52  | 11.842                 |         |        |              |          |        |
|              |         |               |         |        | bruceoside B | -31.241 | 7.939                  |         |        |              |          |        |
|              |         |               |         |        | bruceoside A | -28.302 | 8.469                  |         |        |              |          |        |
|              |         |               |         |        | bruceantinal | -24.676 | 6.984                  |         |        |              |          |        |
|              |         |               |         |        | bruceine I   | -21.79  | 7.755                  |         |        |              |          |        |
| NR3C1        | 3K22    | Flunisolide   | -22.44  | 9.224  | bruceine B   | -18.856 | 6.314                  |         |        |              |          |        |
|              |         |               |         |        | javanicin    | -20.993 | 7.117                  |         |        |              |          |        |
|              |         |               |         |        | PDPK1        | 1H1W    | 7-Hydroxystaurosporine | -33.622 | 9.67   | bruceantin   | -29.895  | 9.698  |
|              |         |               |         |        |              |         |                        |         |        | bruceoside B | -29.752  | 9.59   |
|              |         |               |         |        |              |         |                        |         |        | bruceine E   | -26.645  | 7.847  |
|              |         |               |         |        |              |         |                        |         |        | bruceine I   | -24.293  | 7.759  |
| bruceantinal | -22.751 | 9.649         |         |        |              |         |                        |         |        |              |          |        |
| bruceine G   | -22.683 | 9             |         |        |              |         |                        |         |        |              |          |        |
| PGR          | 1SQN    | Megestrol     | -26.269 | 8.331  | bruceine C   | -22.248 | 7.008                  |         |        |              |          |        |
|              |         |               |         |        | brusatol     | -21.152 | 8.054                  |         |        |              |          |        |
|              |         |               |         |        | bruceine D   | -20.71  | 7.235                  |         |        |              |          |        |
|              |         |               |         |        | bruceine B   | -19.655 | 9.113                  |         |        |              |          |        |
|              |         |               |         |        | javanicin    | -25.565 | 7.017                  |         |        |              |          |        |
|              |         |               |         |        | PLA2G2A      | 1KVO    | Suramin                | -47.158 | 10.526 | bruceoside E | -172.629 | 27.043 |
| bruceine C   | -95.33  | 8.452         |         |        |              |         |                        |         |        |              |          |        |
| bruceine E   | -27.312 | 9.287         |         |        |              |         |                        |         |        |              |          |        |
| PNP          | 3BGS    | Cladribine    | -25.842 | 7.13   | bruceoside A | -35.97  | 10.663                 |         |        |              |          |        |
|              |         |               |         |        | bruceantinal | -24.923 | 7.816                  |         |        |              |          |        |
|              |         |               |         |        | bruceoside E | -19.317 | 10.108                 |         |        |              |          |        |
| POLB         | 3OGU    | Cytarabine    | -17.189 | 5.245  | bruceoside E | -39.394 | 13.394                 |         |        |              |          |        |
|              |         |               |         |        | bruceoside A | -32.743 | 7.781                  |         |        |              |          |        |
|              |         |               |         |        | bruceine C   | -22.135 | 5.771                  |         |        |              |          |        |
|              |         |               |         |        | bruceantinal | -20.806 | 6.981                  |         |        |              |          |        |
| PPARD        | 3TKM    | Sulindac      | -17.377 | 4.658  | javanicin    | -18.274 | 6.234                  |         |        |              |          |        |
| RARA         | 3A9E    | Alitretinoin  | -35.486 | 9.393  | javanicin    | -22.049 | 7.892                  |         |        |              |          |        |
| SIRT5        | 3RIY    | Suramin       | -45.281 | 7.981  | javanicin    | -22.009 | 9.668                  |         |        |              |          |        |
| TOP1         | 1K4T    | Irinotecan    | -27.813 | 7.185  | bruceoside A | -34.469 | 10.568                 |         |        |              |          |        |
|              |         |               |         |        | bruceantinal | -31.527 | 7.669                  |         |        |              |          |        |
|              |         |               |         |        | bruceoside B | -30.118 | 8.146                  |         |        |              |          |        |
|              |         |               |         |        | bruceine I   | -30.026 | 7.121                  |         |        |              |          |        |
|              |         |               |         |        | brusatol     | -28.835 | 7.809                  |         |        |              |          |        |
|              |         |               |         |        | bruceine C   | -26.381 | 7.62                   |         |        |              |          |        |
|              |         |               |         |        | javanicin    | -25.298 | 7.982                  |         |        |              |          |        |
|              |         |               |         |        | bruceine D   | -23.311 | 8.675                  |         |        |              |          |        |
|              |         |               |         |        | bruceine E   | -22.543 | 13.232                 |         |        |              |          |        |
|              |         |               |         |        | bruceine B   | -22.153 | 6.336                  |         |        |              |          |        |
| TYMS         | 1HVY    | Raltitrexed   | -31.948 | 9.098  | bruceine C   | -30.566 | 9.031                  |         |        |              |          |        |
|              |         |               |         |        | bruceantinal | -26.186 | 8.215                  |         |        |              |          |        |
|              |         |               |         |        | javanicin    | -24.629 | 7.894                  |         |        |              |          |        |
| VDR          | 3B0T    | Calcitriol    | -34.923 | 10.175 | javanicin    | -24.512 | 11.345                 |         |        |              |          |        |

\* A research drug of PDPK1.

For each protein target, same active pocket site was adopted for binding affinity comparison between an ingredient-drug pair. The docking was demonstrated using the Ligand Explorer model (LigX) module of the commercial software MOE with the parameters of: Receptor: Receptor+Solvent, Rescoring 1: London dG, Retain: 30, Refinement: Forcefield (Amber99). Solvation effects were calculated using the reaction field functional form for the electrostatic energy term and a dielectric constant of 4. The lower MM/GBVI suggests the higher binding affinity, while the higher pki indicates better binding affinity.



**Table S3.** The list of anticancer protein targets, their corresponding marketing drugs and the Yadanzi ingredients that were predicted to bind to these targets.

| Targets | Drugs                                                                                                            | Ingredients*                          |
|---------|------------------------------------------------------------------------------------------------------------------|---------------------------------------|
| ABL1    | Dasatinib, Nilotinib, Imatinib                                                                                   | A; B; C; D; E; F; G; H; I; J; K; L; M |
| AKR1B1  | Nilutamide, Sulindac                                                                                             | A; B; C; D; F; G; H; I; J; K; L; M    |
| AR      | Oxandrolone, Nilutamide, Bicalutamide, Flutamide                                                                 | C; D; H; I; J                         |
| ATIC    | Pemetrexed                                                                                                       | B; C; D; E; F; G; H; I; J; K; L; M    |
| BRAF    | Sorafenib                                                                                                        | A; B; C; E; F; G; H; I; J; K; L; M    |
| C1R     | Cetuximab <sup>#</sup>                                                                                           | B; C; D; H; I; J; K                   |
| CHD1    | Epirubicin                                                                                                       | A; B; C; D; E; F; G; H; I; J; K; L; M |
| CSF1R   | Sunitinib                                                                                                        | B; C; D; F; G; H; I; J; K             |
| DCK     | Fludarabine                                                                                                      | B; C; D; G; H; I; J; K                |
| DHFR    | Pemetrexed, Trimetrexate                                                                                         | A; B; C; D; F; G; H; I; J; K; L       |
| DHODH   | Leflunomide                                                                                                      | H; I                                  |
| EGFR    | Erlotinib, Lapatinib, Gefitinib                                                                                  | A; B; C; D; E; F; G; H; I; J; K; L; M |
| ERBB2   | Trastuzumab <sup>#</sup>                                                                                         | B; C; D; E; F; G; H; I; J; K          |
| ESR1    | Chlorotrianisene, Toremifene, Estrone, Tamoxifen, Fulvestrant, Fluoxymesterone, Estramustine, Diethylstilbestrol | A; B; C; D; F; G; H; I; K             |
| ESRRG   | Diethylstilbestrol                                                                                               | A; B; C; D; E; F; G; H; I; J; K; L    |
| F2      | Suramin                                                                                                          | A; B; C; D; E; F; G; H; I; J; K; L; M |
| FDPS    | Pamidronate                                                                                                      | B; C; D; E; F; G; H; I; J; K; L       |
| FSHR    | Suramin                                                                                                          | A; C; D; F; H; I; J; K; M             |
| GART    | Pemetrexed                                                                                                       | A; B; C; D; E; F; G; H; I; J; K; L; M |
| GSR     | Carmustine                                                                                                       | B; C; D; F; G; H; I; J; K             |
| HDAC8   | Vorinostat                                                                                                       | B; C; D; I; J                         |
| HMGCR   | Lovastatin                                                                                                       | A; B; C; D; E; F; G; H; I; J; K; L; M |
| HPRT1   | Azathioprine                                                                                                     | B; C; D; F; H; I; J; K                |
| IMPDH1  | Mycophenolic acid, Mycophenolate                                                                                 | L                                     |
| IMPDH2  | Mycophenolic acid, Mycophenolate                                                                                 | A; B; C; D; F; G; H; I; J; K; L; M    |
| ITGAL   | Lovastatin                                                                                                       | B; C; D; G; H; I; J; K                |
| KDR     | Sunitinib, Sorafenib                                                                                             | A; B; C; D; E; F; G; H; L             |
| KIT     | Sorafenib, Imatinib, Sunitinib                                                                                   | A; B; C; D; E; H; I; K                |
| LDLR    | Porfimer                                                                                                         | B; C; D; F; H; I; J; L                |
| MAPK1   | Arsenic trioxide <sup>#</sup>                                                                                    | B; F; K                               |
| MMP1    | Marimastat                                                                                                       | A; B; C; D; E; F; G; H; I; J; K; L    |
| MMP10   | Marimastat                                                                                                       | A; B; C; D; F; G; H; I; J; K          |
| MMP12   | Marimastat                                                                                                       | A; B; C; D; E; F; G; H; I; J; K; L; M |
| MMP13   | Marimastat                                                                                                       | F; I; K                               |
| MMP2    | Marimastat                                                                                                       | A; B; C; D; G; H; I; J; K; L          |
| MMP3    | Marimastat                                                                                                       | B; C; D; F; G; H; I; J; K; L          |
| MMP7    | Marimastat                                                                                                       | B; C; H; I; K                         |
| MMP8    | Marimastat                                                                                                       | B; C; D; G; H; I; J; K                |

|         |                                                                                           |                                       |
|---------|-------------------------------------------------------------------------------------------|---------------------------------------|
| MMP9    | Marimastat                                                                                | I; J                                  |
| NOS2    | Dexamethasone                                                                             | A; B; C; D; E; F; G; H; I; J; K; L; M |
| NR3C1   | Megestrol, Prednisone, Prednisolone, Fluoxymesterone, Dexamethasone, Flunisolide          | C; D; H; I; J; K                      |
| PGR     | Megestrol                                                                                 | B; C; D; G; H; I; J; K; L             |
| PLA2G2A | Suramin,                                                                                  | A; B; C; D; F; G; H; I; J; K; L       |
| PNP     | Cladribine                                                                                | A; B; C; D; F; G; H; I; J; K; L; M    |
| POLB    | Cytarabine                                                                                | A; B; C; D; E; F; G; H; I; J; K; L; M |
| PPARD   | Sulindac                                                                                  | A; B; C; D; F; G; H; I; J; K;         |
| RARA    | Isotretinoin, Alitretinoin                                                                | B; C; D; E; F; H; K; L;               |
| RXRA    | Alitretinoin                                                                              | A; B; C; D; F; G; H; I; J; K; L; M    |
| SHMT1   | Mimosine                                                                                  | B; C; D; F; H; I; J; K                |
| SIRT5   | Suramin                                                                                   | B; C; D; F; G; H; I; J; K             |
| TOP1    | Topotecan, Irinotecan                                                                     | A; B; C; D; E; F; G; H; I; J; K; L; M |
| TUBG1   | Vinblastine                                                                               | E; K                                  |
| TYMS    | Raltitrexed, Floxuridine, Gemcitabine, Fluorouracil, Pemetrexed, Leucovorin, Capecitabine | B; C; D; F; G; H; I; J; K; L          |
| VDR     | Calcitriol                                                                                | H; I; J                               |
| PDPK1   | 7-Hydroxystaurosporine                                                                    | B; C; D; E; F; G; H; I; J; K; L       |

\* bruceoside\_e: A, bruceine\_b: B, bruceine\_d: C, bruceine\_e: D, bruceoside\_b: E, bruceine\_c: F, bruceantin: G, bruceine\_i: H, javanicin: I, bruceine\_g: J, brusatol: K, bruceantinol: L, bruceoside\_a: M.

# The marked drugs are either antibodies or mineral medicines, which were not applicable for docking analysis and pharmacophore analysis.

**Table S4.** The consensus pharmacophore analysis of marketing drugs and Yadanzi ingredients when they bind to the common protein targets.

| Targets | Drugs Number | Ingredients Number | Pharmacophore Feature Groups |         |         |
|---------|--------------|--------------------|------------------------------|---------|---------|
|         |              |                    | Group 1                      | Group 2 | Group 3 |
| ABL1    | 3            | 13                 | 92.31%                       | 92.31%  | 92.31%  |
| AKR1B1  | 2            | 12                 | 66.67%                       | 66.67%  | 0.00%   |
| AR      | 4            | 5                  | 80.00%                       | 60.00%  | 60.00%  |
| ATIC    | 1            | 12                 | 66.67%                       | 58.33%  | 0.00%   |
| BRAF    | 1            | 12                 | 66.67%                       | 41.67%  | 0.00%   |
| CHD1    | 1            | 13                 | 61.54%                       | 61.54%  | 61.54%  |
| CSF1R   | 1            | 9                  | 44.44%                       | 44.44%  | 55.56%  |
| DCK     | 1            | 8                  | 100.00%                      | 25.00%  | 37.50%  |
| DHFR    | 2            | 11                 | 90.91%                       | 0.00%   | 0.00%   |
| DHODH   | 1            | 2                  | 100.00%                      | 100.00% | 50.00%  |
| EGFR    | 3            | 13                 | 84.62%                       | 76.92%  | 69.23%  |
| ESR1    | 8            | 9                  | 100.00%                      | 77.78%  | 0.00%   |
| ESRRG   | 1            | 12                 | 58.33%                       | 50.00%  | 41.67%  |
| F2      | 1            | 13                 | 61.54%                       | 69.23%  | 53.85%  |
| FDPS    | 1            | 11                 | 90.91%                       | 54.55%  | 0.00%   |
| FSHR    | 1            | 9                  | 88.89%                       | 88.89%  | 44.44%  |
| GART    | 1            | 13                 | 76.92%                       | 0.00%   | 0.00%   |
| GSR     | 1            | 9                  | 77.78%                       | 44.44%  | 0.00%   |
| HDAC8   | 1            | 5                  | 100.00%                      | 60.00%  | 80.00%  |
| HMGCR   | 1            | 13                 | 76.92%                       | 69.23%  | 61.54%  |
| HPRT1   | 1            | 8                  | 87.50%                       | 50.00%  | 50.00%  |
| IMPDH1  | 2            | 1                  | 100.00%                      | 100.00% | 100.00% |
| IMPDH2  | 2            | 12                 | 75.00%                       | 50.00%  | 0.00%   |
| ITGAL   | 1            | 8                  | 75.00%                       | 50.00%  | 0.00%   |
| KDR     | 2            | 9                  | 100.00%                      | 66.67%  | 55.56%  |
| KIT     | 3            | 8                  | 75.00%                       | 50.00%  | 37.50%  |
| LDLR    | 1            | 8                  | 100.00%                      | 62.50%  | 62.50%  |
| MMP1    | 1            | 12                 | 66.67%                       | 66.67%  | 66.67%  |
| MMP10   | 1            | 10                 | 80.00%                       | 70.00%  | 50.00%  |
| MMP12   | 1            | 13                 | 69.23%                       | 61.54%  | 53.85%  |
| MMP13   | 1            | 3                  | 66.67%                       | 66.67%  | 33.33%  |
| MMP2    | 1            | 10                 | 60.00%                       | 60.00%  | 40.00%  |
| MMP3    | 1            | 10                 | 80.00%                       | 80.00%  | 70.00%  |
| MMP7    | 1            | 5                  | 80.00%                       | 40.00%  | 40.00%  |
| MMP8    | 1            | 8                  | 12.50%                       | 0.00%   | 0.00%   |
| MMP9    | 1            | 2                  | 100.00%                      | 100.00% | 100.00% |

|         |   |    |         |         |         |
|---------|---|----|---------|---------|---------|
| NOS2    | 1 | 13 | 69.23%  | 69.23%  | 61.54%  |
| NR3C1   | 6 | 6  | 100.00% | 100.00% | 0.00%   |
| PGR     | 1 | 9  | 88.89%  | 77.78%  | 55.56%  |
| PLA2G2A | 1 | 11 | 81.82%  | 81.82%  | 54.55%  |
| PNP     | 1 | 12 | 83.33%  | 66.67%  | 75.00%  |
| POLB    | 1 | 13 | 100.00% | 76.92%  | 69.23%  |
| PPARD   | 1 | 10 | 70.00%  | 60.00%  | 0.00%   |
| RARA    | 2 | 8  | 87.50%  | 62.50%  | 0.00%   |
| RXRA    | 1 | 8  | 83.3%   | 0.00%   | 0.00%   |
| SHMT1   | 1 | 8  | 87.50%  | 75.00%  | 62.50%  |
| SIRT5   | 1 | 9  | 88.89%  | 77.78%  | 55.56%  |
| TOP1    | 2 | 13 | 69.23%  | 69.23%  | 61.54%  |
| TUBG1   | 1 | 2  | 100.00% | 100.00% | 100.00% |
| TYMS    | 7 | 10 | 60.00%  | 30.00%  | 60.00%  |
| VDR     | 1 | 3  | 100.00% | 66.67%  | 66.67%  |
| PDPK1   | 1 | 11 | 90.91%  | 81.82%  | 72.73%  |

The target-drug-ingredients relations were acquired from the Table S5. The pharmacophore feature groups were determined using the Pharmacophore module of the Molecular Operating Environment (MOE) software. Only those pharmacophore groups that contains at least one marketing drugs were chosen for consensus pharmacophore analysis. For each pharmacophore group, the consensus of pharmacophore was measured by calculating the number of ingredients that contain this pharmacophore group against all ingredients that bind to the target protein (refer to the supplementary method section). The consensus of the top 3 consistent pharmacophore groups was given here.

**Table S5.** The list of Yadanzi ingredient-target pairs that were estimated to have better binding affinity than their corresponding protein-drug interactions.

| Targets | PDB_ID | Drugs                 |                    |                | Ingredients  |                    |                |
|---------|--------|-----------------------|--------------------|----------------|--------------|--------------------|----------------|
|         |        | Name                  | MM/GBVI (kcal/mol) | Affinity (pki) | Name         | MM/GBVI (kcal/mol) | Affinity (pki) |
| AKR1B1  | 1US0   | Sulindac              | -24.997            | 6.462          | Bruceoside A | -29.122            | 8.013          |
| ATIC    | 1P4R   | Pemetrexed            | -22.102            | 6.225          | Bruceine C   | -41.855            | 13.78          |
|         |        |                       |                    |                | Bruceoside B | -34.52             | 12.026         |
| BRAFF   | 1UWH   | Sorafenib             | -27.164            | 7.196          | Bruceoside A | -27.845            | 8.441          |
|         |        |                       |                    |                | Bruceoside B | -33.072            | 8.225          |
| CHD1    | 2B2W   | Epirubicin            | -26.73             | 12.638         | Bruceantanol | -31.501            | 17.845         |
|         |        |                       |                    |                | Javanicin    | -28.987            | 8.337          |
| ESRRG   | 2E2R   | Diethylstilbestrol    | -14.958            | 6.175          | Bruceoside A | -28.967            | 7.825          |
|         |        |                       |                    |                | Brusatol     | -28.967            | 7.825          |
| F2      | 2BVR   | Suramin               | -47.664            | 10.746         | Bruceine C   | -32.183            | 9.595          |
| IMPDH1  | 1JCN   | Mycophenolate mofetil | -27.377            | 9.48           | Bruceine C   | -49.037            | 12.206         |
|         |        |                       |                    |                | Bruceantanol | -31.491            | 10.768         |
| MMP1    | 1HFC   | Marimastat            | -17.288            | 5.931          | Bruceoside A | -33.149            | 11.043         |
|         |        |                       |                    |                | Bruceine C   | -29.788            | 11.225         |
| MMP10   | 1Q3A   | Marimastat            | -25.978            | 6.607          | Bruceoside E | -291.2             | 21.28          |
|         |        |                       |                    |                | Bruceine C   | -137.49            | 7.732          |
| MMP12   | 1Y93   | Marimastat            | -31.953            | 5.251          | Bruceine E   | -38.881            | 11.529         |
|         |        |                       |                    |                | Bruceoside E | -342.849           | 20.609         |
| MMP2    | 1HOV   | Marimastat            | -25.879            | 4.451          | Bruceine C   | -149.387           | 10.908         |
|         |        |                       |                    |                | Bruceine E   | -52.825            | 12.198         |
| MMP3    | 1HY7   | Marimastat            | -33.438            | 7.214          | Bruceine C   | -125.984           | 6.629          |
|         |        |                       |                    |                | Bruceoside E | -542.643           | 33.914         |
| MMP7    | 2Y6D   | Marimastat            | -32.87             | 6.036          | Bruceine E   | -71.895            | 17.592         |
|         |        |                       |                    |                | Javanicin    | -29.123            | 8.386          |
| MMP8    | 1I76   | Marimastat            | -19.645            | 6.376          | Bruceine E   | -50.418            | 11.103         |
|         |        |                       |                    |                | Bruceine D   | -29.848            | 6.914          |
| NOS2    | 3E7G   | Dexamethasone         | -17.896            | 6.151          | Bruceine C   | -142.23            | 8.392          |
|         |        |                       |                    |                | Bruceoside E | -52.52             | 11.842         |
| PLA2G2A | 1KVO   | Suramin               | -47.158            | 10.526         | Bruceoside B | -31.241            | 7.939          |
|         |        |                       |                    |                | Bruceoside A | -28.302            | 8.469          |
| PNP     | 3BGS   | Cladribine            | -25.842            | 7.13           | Bruceoside E | -172.629           | 27.043         |
| POLB    | 3OGU   | Cytarabine            | -17.189            | 5.245          | Bruceoside A | -35.97             | 10.663         |
|         |        |                       |                    |                | Bruceoside E | -39.394            | 13.394         |
| PPARD   | 3TKM   | Sulindac              | -17.377            | 4.658          | Bruceoside A | -32.743            | 7.781          |
|         |        |                       |                    |                | Javanicin    | -18.274            | 6.234          |
| TOP1    | 1K4T   | Irinotecan            | -27.813            | 7.185          | Bruceoside A | -34.469            | 10.568         |
|         |        |                       |                    |                | Bruceantanol | -31.527            | 7.669          |
|         |        |                       |                    |                | Bruceoside B | -30.118            | 8.146          |
|         |        |                       |                    |                | Brusatol     | -28.835            | 7.809          |

For each therapeutic target, same active pocket site was adopted for binding affinity comparison between an ingredient and drug pair. The docking was demonstrated and refined using the commercial software MOE with the parameters of Receptor: Receptor+Solvent, Rescoring 1: London dG, Retain: 30, Refinement: Forcefield (MMFF94x). The complete result is given in the Table S4.

**Table S6.** The list of the enriched cancer pathways that the Yadanzi ingredients are likely associated with.

| Cancer Pathway                      | Count | Percentage (%)* | Fold Enrichment | P value  | Putative targets                                                                                                                                                                                                                                                                                                                                                                                                                                                           |
|-------------------------------------|-------|-----------------|-----------------|----------|----------------------------------------------------------------------------------------------------------------------------------------------------------------------------------------------------------------------------------------------------------------------------------------------------------------------------------------------------------------------------------------------------------------------------------------------------------------------------|
| hsa05213:Endometrial cancer         | 18    | 2.99            | 2.92            | 5.67E-05 | EGFR, PIK3CG, HRAS, BRAF, MAP2K1, MAP2K2, GRB2, ERBB2, CTNNA1, PTEN, CTNNB1, MAPK1, PDPK1, CASP9, GSK3B, SOS1, APC, AKT2                                                                                                                                                                                                                                                                                                                                                   |
| hsa05219:Bladder cancer             | 14    | 2.32            | 2.81            | 7.66E-04 | EGFR, HRAS, BRAF, MAP2K1, MAP2K2, ERBB2, MMP9, DAPK2, MMP2, MMP1, DAPK1, MAPK1, TYMP, MDM2                                                                                                                                                                                                                                                                                                                                                                                 |
| hsa05223:Non-small cell lung cancer | 17    | 2.82            | 2.65            | 3.39E-04 | EGFR, PIK3CG, FHIT, HRAS, MAP2K1, BRAF, MAP2K2, GRB2, RXRA, ERBB2, CDK6, PRKCB, MAPK1, PDPK1, CASP9, SOS1, AKT2                                                                                                                                                                                                                                                                                                                                                            |
| hsa05220:Chronic myeloid leukemia   | 23    | 3.81            | 2.59            | 3.25E-05 | PIK3CG, HRAS, CTBP1, CTBP2, BCR, MAP2K1, BRAF, MAP2K2, GRB2, TGFB1, CBL, SMAD4, CDK6, BCL2L1, PTPN11, MAPK1, CBLB, CDKN1B, SOS1, MDM2, ABL1, CRK, AKT2                                                                                                                                                                                                                                                                                                                     |
| hsa05215:Prostate cancer            | 26    | 4.31            | 2.46            | 2.18E-05 | FGFR1, HRAS, GRB2, ERBB2, PTEN, CTNNB1, IGF1R, PDPK1, CASP9, INS, SOS1, AKT2, EGFR, PIK3CG, AR, HSP90AA1, BRAF, MAP2K1, MAP2K2, CDK2, MAPK1, CDKN1B, GSK3B, MDM2, MTOR, GSTP1                                                                                                                                                                                                                                                                                              |
| hsa05210:Colorectal cancer          | 24    | 3.98            | 2.41            | 7.19E-05 | EGFR, PIK3CG, MSH6, MAP2K1, BRAF, MSH2, GRB2, TGFB1, SMAD4, SMAD2, MAPK10, CTNNB1, MAPK1, IGF1R, CASP3, RAC2, CASP9, RAC3, GSK3B, SOS1, RAC1, MAPK8, APC, AKT2                                                                                                                                                                                                                                                                                                             |
| hsa05216:Thyroid cancer             | 8     | 1.33            | 2.33            | 4.80E-02 | MAPK1, HRAS, MAP2K1, BRAF, MAP2K2, RXRA, PPARG, CTNNB1                                                                                                                                                                                                                                                                                                                                                                                                                     |
| hsa05214:Glioma                     | 17    | 2.82            | 2.28            | 2.13E-03 | EGFR, PIK3CG, HRAS, BRAF, MAP2K1, MAP2K2, GRB2, CDK6, PTEN, PRKCB, IGF1R, MAPK1, SOS1, MDM2, MTOR, CALM1, AKT2                                                                                                                                                                                                                                                                                                                                                             |
| hsa05212:Pancreatic cancer          | 19    | 3.15            | 2.23            | 1.40E-03 | EGFR, PIK3CG, MAP2K1, BRAF, ERBB2, TGFB1, SMAD4, CDK6, SMAD2, BCL2L1, MAPK10, CDC42, MAPK1, RAC2, CASP9, RAC3, RAC1, MAPK8, AKT2                                                                                                                                                                                                                                                                                                                                           |
| hsa05221:Acute myeloid leukemia     | 15    | 2.49            | 2.18            | 6.45E-03 | PIK3CG, HRAS, PPAR, BRAF, MAP2K1, MAP2K2, GRB2, PIM1, KIT, MAPK1, EIF4EBP1, SOS1, RARA, MTOR, AKT2                                                                                                                                                                                                                                                                                                                                                                         |
| hsa05211:Renal carcinoma            | 15    | 2.49            | 1.81            | 3.25E-02 | PIK3CG, HRAS, BRAF, MAP2K1, MAP2K2, GRB2, EGLN1, PTPN11, MAPK1, CDC42, SOS1, PAK4, RAC1, CRK, AKT2                                                                                                                                                                                                                                                                                                                                                                         |
| hsa05200:Pathways in cancer         | 70    | 11.6            | 1.8             | 6.10E-07 | PPAR, HRAS, MMP9, PPARG, MMP2, PTEN, MMP1, CTNNB1, CDC42, CASP3, CASP9, RHOA, RARA, NOS2, FGF1, AKT2, EGFR, PIK3CG, CTBP1, AR, HSP90AA1, CTBP2, BCR, BRAF, RXRA, SKP2, CDK6, DAPK2, CTNNA1, CDK2, DAPK1, PRKCB, MAPK1, MDM2, MAPK8, GSTP1, ITGA2B, CKS1B, TRAF2, FGFR1, GRB2, ERBB2, KITLG, EGLN1, BCL2L1, KIT, IGF1R, PTK2, RAC2, RAC3, SOS1, ITGAV, RAC1, APC, CSF1R, MSH6, MAP2K1, MSH2, MAP2K2, TGFB1, CBL, SMAD4, SMAD2, MAPK10, CBLB, CDKN1B, GSK3B, MTOR, ABL1, CRK |
| hsa05222:Small cell lung cancer     | 17    | 2.82            | 1.71            | 3.53E-02 | PIK3CG, FHIT, CKS1B, TRAF2, RXRA, SKP2, CDK6, BCL2L1, PTEN, CDK2, PTK2, CDKN1B, CASP9, ITGAV, NOS2, AKT2, ITGA2B                                                                                                                                                                                                                                                                                                                                                           |
| hsa05218:Melanoma                   | 14    | 2.32            | 1.66            | 7.08E-02 | PIK3CG, EGFR, FGFR1, HRAS, BRAF, MAP2K1, MAP2K2, CDK6, PTEN, IGF1R, MAPK1, MDM2, FGF1, AKT2                                                                                                                                                                                                                                                                                                                                                                                |

\* Percentage out of the 603 targets annotated in the KEGG pathways.
